# Supplementary figures and images for: Efficacy of Tucatinib for HER2-Positive Metastatic Breast Cancer After HER2-Targeted Therapy: A Network Meta-Analysis
Source: Atypon-hosted journal article supplement (doi:10.2217/fon-2021-0742), 2021-08-31

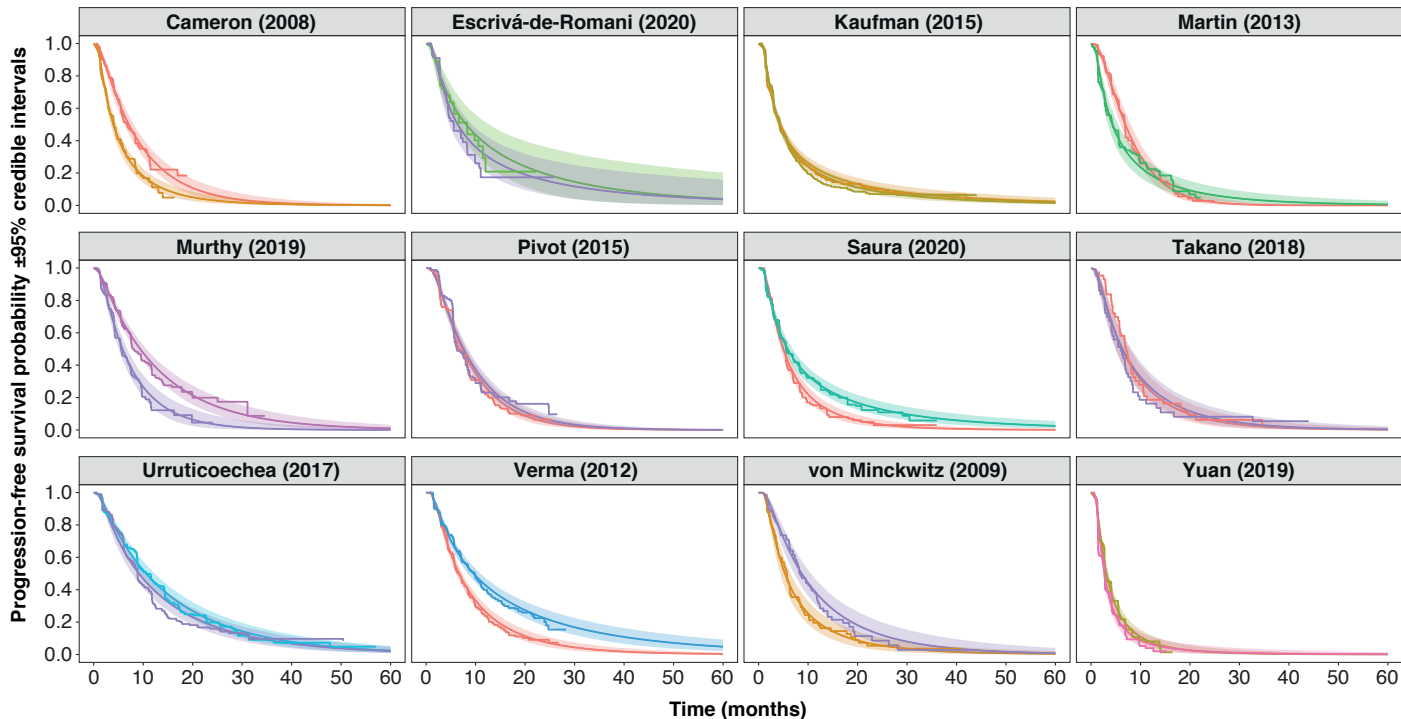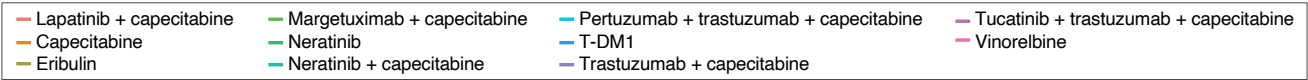

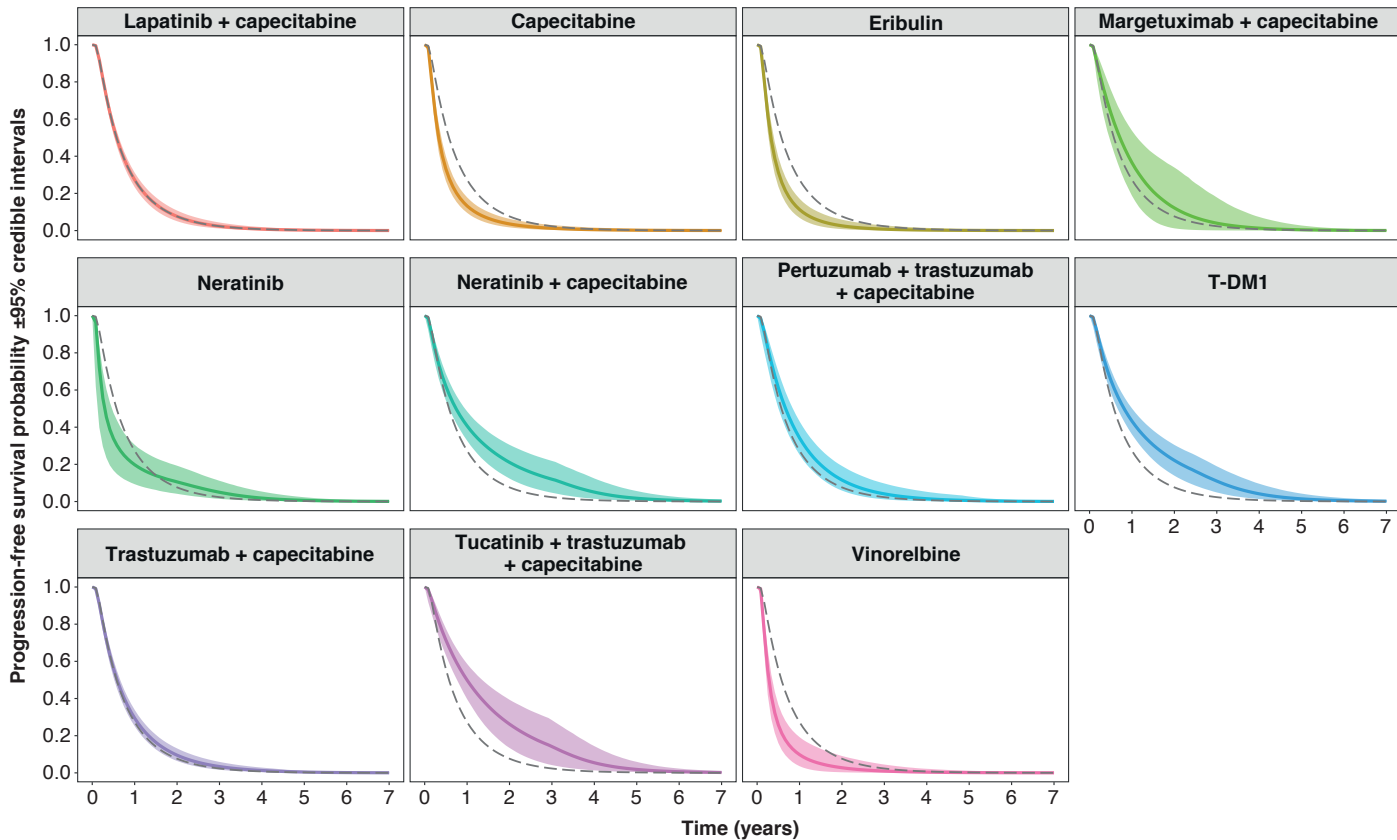

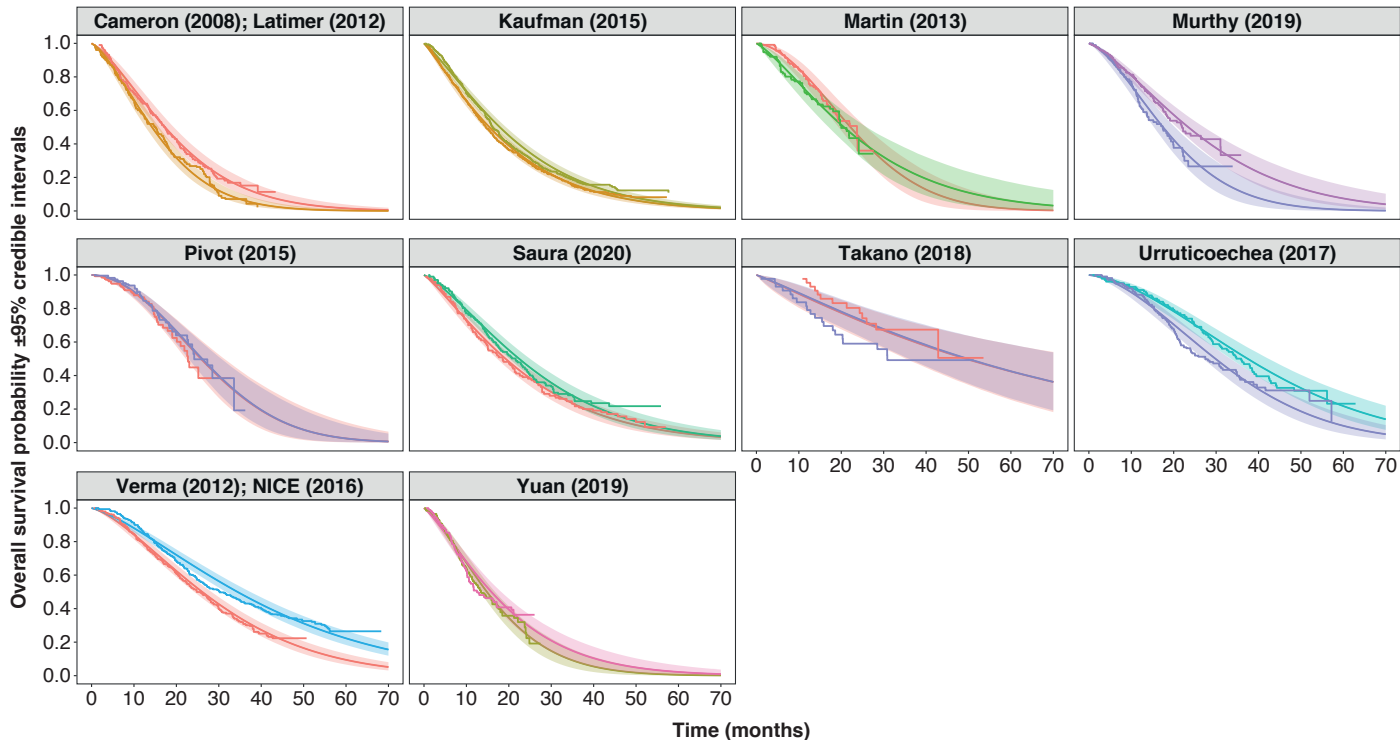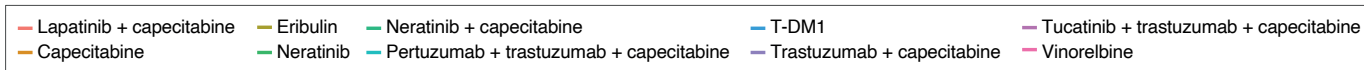

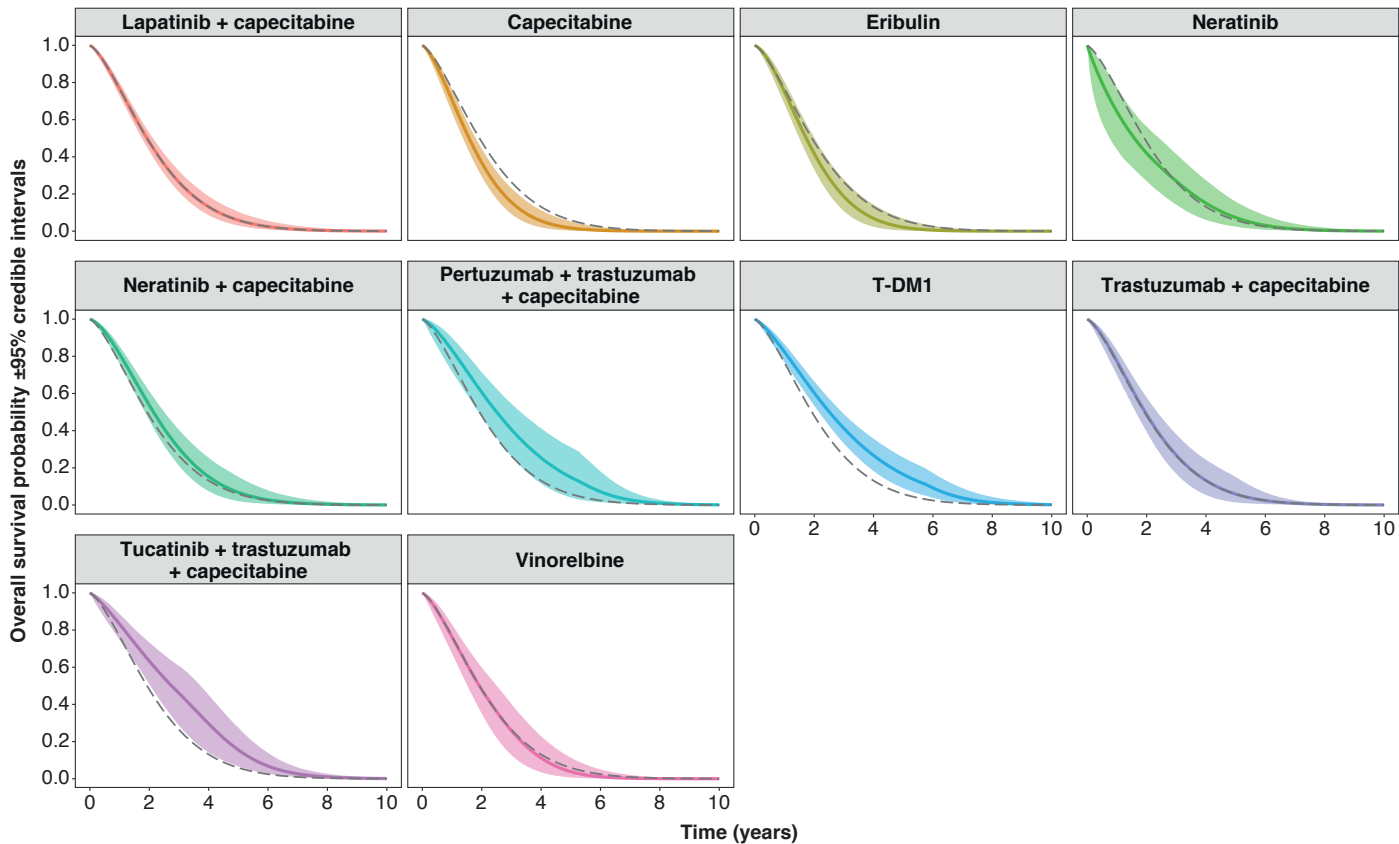

Supplement: supplementary_figure_2_a-d.pdf [file supplementary_figure_2_a-d.pdf]
